# Supplementary material for: Linoleic acid metabolism activation in macrophages promotes the clearing of intracellular Staphylococcus aureus
Source: PubMed Central journal article supplement — Chem Sci. 2022 Oct 11;13(42):12445–60. doi: 10.1039/d2sc04307f (PMC9629105; doi:10.1039/d2sc04307f), 2022-10-11
Supplement: SC-013-D2SC04307F-s001.pdf [file SC-013-D2SC04307F-s001.pdf]

## Supplementary information

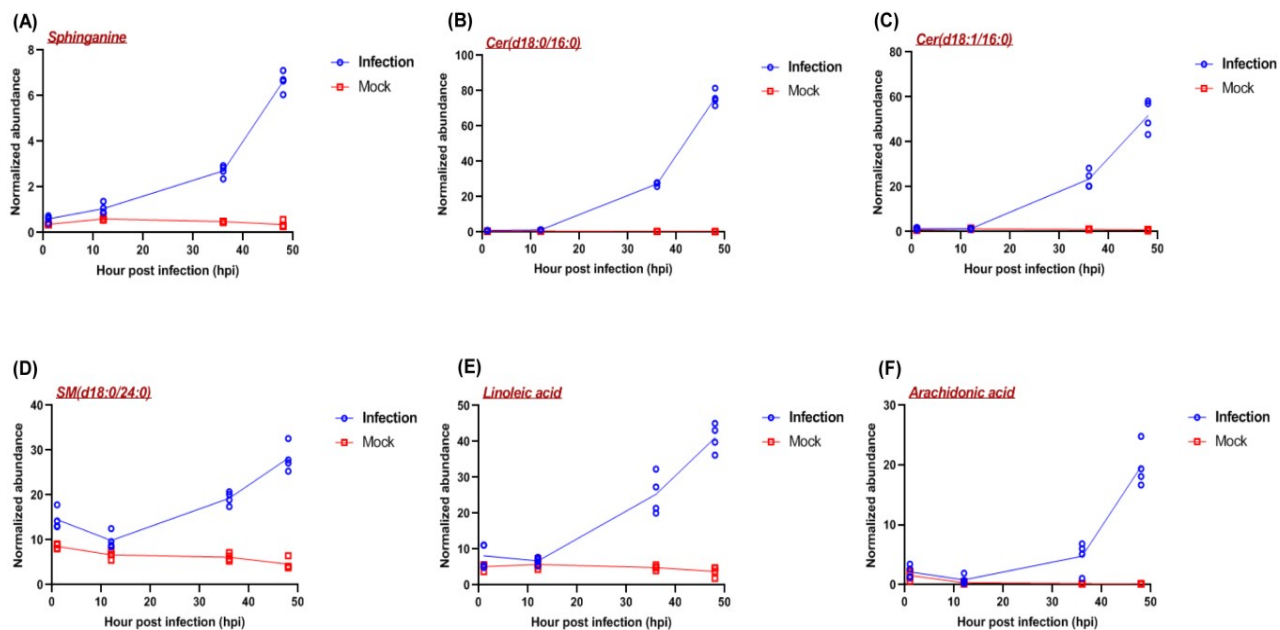

**Figure S1. (A-F)** The abundance trend of selected representative lipids at different infection time points. Data are shown as an individual measurement of four independent experiments (n=4) for infected and mock samples respectively at each time point. **(A)** Sphinganine, **(B)** Cer(d18:0/16:0), **(C)** Cer(d18:1/16:0), **(D)** SM(d18:0/24:0), **(E)** Linoleic acid, **(F)** Arachidonic acid.

32

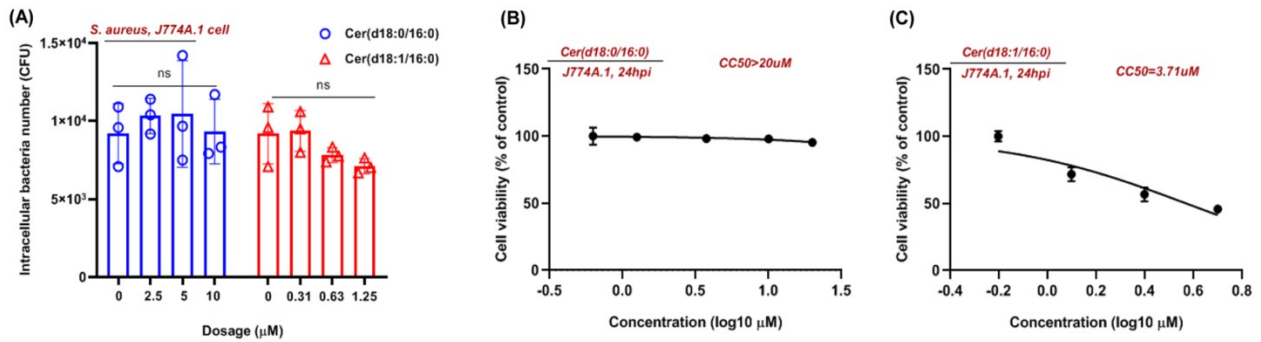

**Figure S2.** (A) Intracellular bacterial loads were determined by counting CFU after different concentration of cer(d18:0/16:0) and cer(d18:1/16:0) treatments. (B and C) *In vitro* cytotoxicity assays of cer(d18:0/16:0) (B) and cer(d18:1/16:0) (C) were shown. Cells were incubated with different dosage of cer(d18:0/16:0) and cer(d18:1/16:0) or DMSO for 24 hours to evaluate cytotoxicity by MTT assay.

33  
34  
35

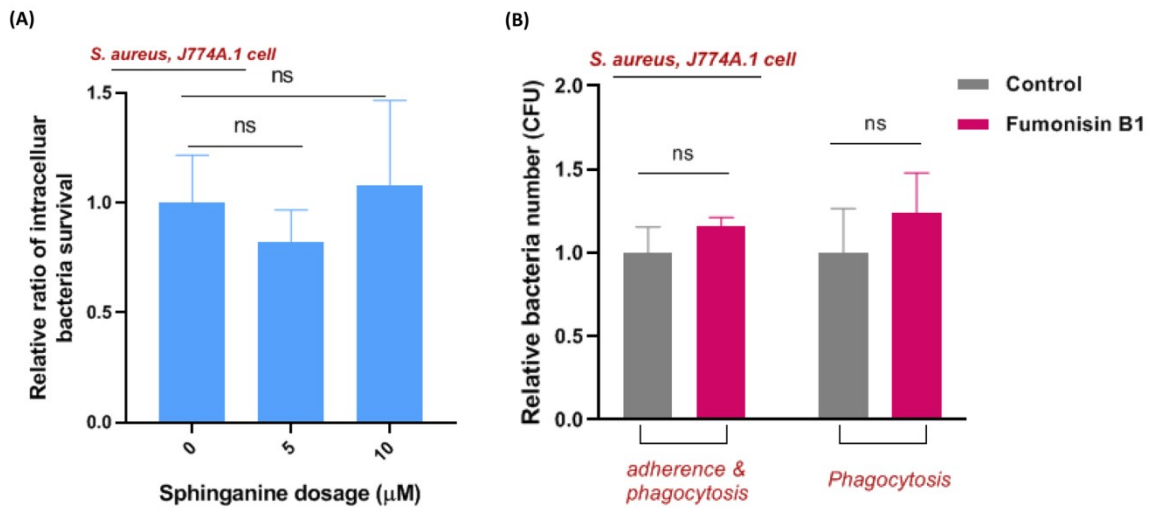

**Figure S3.** (A) The relative ratios of intracellular survival of *S. aureus* after sphinganine treatment for 24 hours. (B) The relative bacterial number comparison of *S. aureus* adhesion and phagocytosis by J774A.1 cells after fumonisin treatment for 1 and 2 hours respectively. The numbers of bacterial CFU released from the lysed macrophages were determined by plating lysates on BHI agar plates.

36  
37

38

39

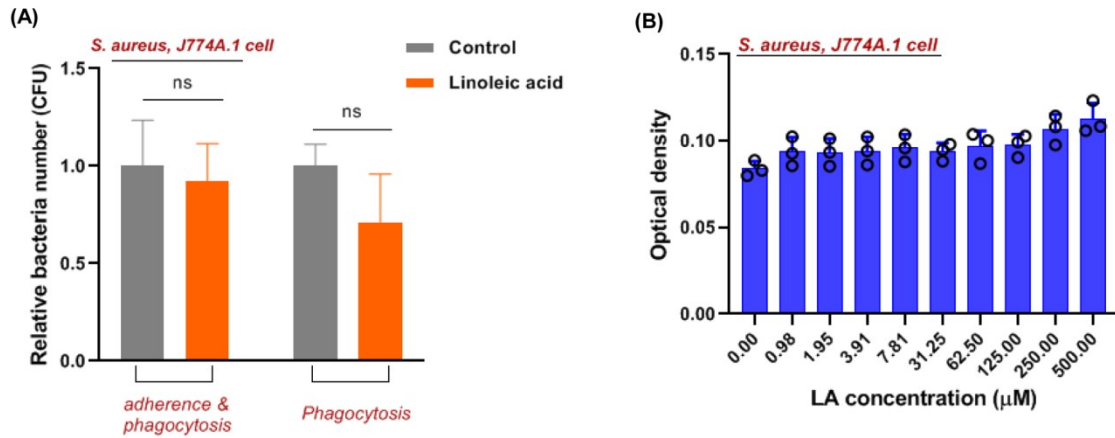

**Figure S4. (A)** The relative bacterial number comparison of *S. aureus* adhesion and phagocytosis by J774A.1 cells after linoleic acid treatment for 1 and 2 hours respectively. The numbers of bacterial CFU released from the lysed macrophages were determined by plating lysates on BHI agar plates. **(B)** The minimum inhibitory concentration measurement of linoleic acid (LA) incubated with *S. aureus* in Dulbecco's Modified Eagle Medium (DMEM) for 18 hours.

40

41

42

43

44

45

46

47

48

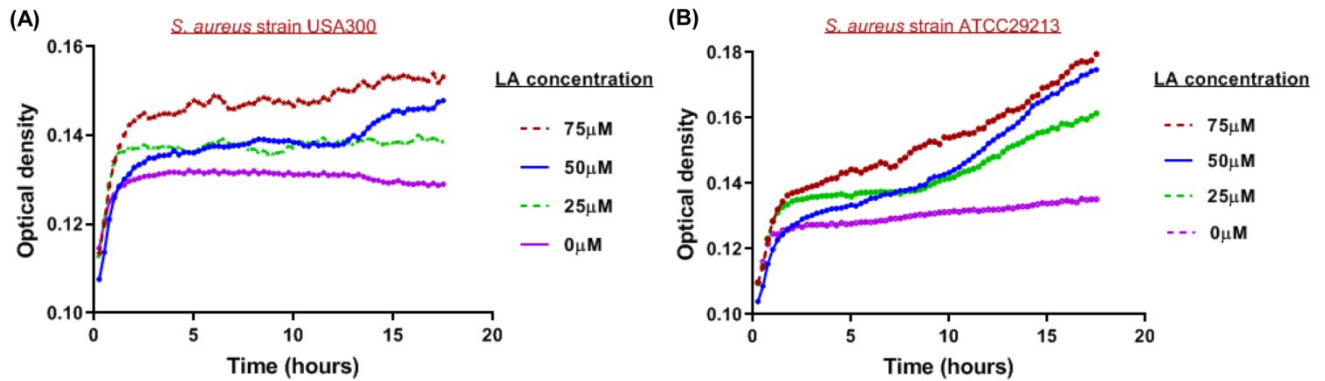

**Figure S5. (A and B)** The dynamic growth curve of *S. aureus* USA 300 strain **(A)** and ATCC29213 **(B)** treated with different concentrations of linoleic acid (LA) for 18 hours in Dulbecco's Modified Eagle Medium (DMEM).

49

50

51

52

53

54

55

56

57  
58  
59

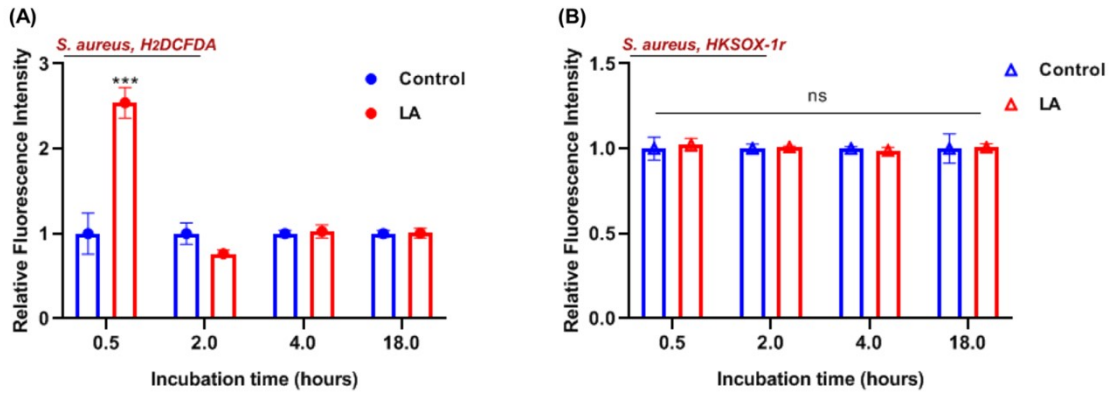

**Figure S6. (A and B)** Quantified relative fluorescence intensities of ROS (H<sub>2</sub>DCFDA probe, **A**) and superoxide (HKSOX-1r probe, **B**) upon LA (25 μM) treatments at indicated incubation times in *S. aureus*. Data are shown as mean ± SD of four independent experiments. Unpaired t-test was used to analyze the significance of the observed differences. For all statistical analysis above, \*p<0.05, \*\*p<0.01 and \*\*\*p<0.001.

60

**Table S1. The coefficient of variation (CV) of spike-in standards in the current analytical batch**

| <b>Lipids name</b>  | <b>Retention time (min)</b> | <b>Accurate mass</b> | <b>Detection mode</b> | <b>Adduct ion name</b> | <b>CV in 1h samples</b> | <b>CV in 12h samples</b> | <b>CV in 36h samples</b> | <b>CV in 48h samples</b> | <b>CV in QC samples</b> |
|---------------------|-----------------------------|----------------------|-----------------------|------------------------|-------------------------|--------------------------|--------------------------|--------------------------|-------------------------|
| Arachidonic acid-d8 | 2.02                        | 311.2829             | negative              | [M-H] <sup>-</sup>     | 12.54%                  | 14.22%                   | 12.36%                   | 14.67%                   | 5.18%                   |
| 15(s)-HETE-d8       | 1.04                        | 327.2768             | negative              | [M-H] <sup>-</sup>     | 6.67%                   | 10.17%                   | 4.66%                    | 5.23%                    | 3.82%                   |
| Leukotriene-B4-d4   | 0.82                        | 339.2483             | negative              | [M-H] <sup>-</sup>     | 9.59%                   | 17.78%                   | 18.56%                   | 17.58%                   | 9.90%                   |
| PAF-C16-d4          | 1.66                        | 528.3975             | positive              | [M+H] <sup>+</sup>     | 7.33%                   | 8.38%                    | 9.84%                    | 2.86%                    | 17.50%                  |

**Table S2. The 158 lipids that were significantly different between bacterial infections and mock controls**

| Time point | Lipids id | Significant lipids    | Detection mode | Retention time | Accurate mass | Adduct ion name | Lipids species | Identification information | Fold change in infected vs control | p-Value in infected vs control | VIP in infected vs control |
|------------|-----------|-----------------------|----------------|----------------|---------------|-----------------|----------------|----------------------------|------------------------------------|--------------------------------|----------------------------|
| 1hr        | 477       | PE(16:0/0:0)          | Neg            | 1.40           | 452.2773      | [M-H]-          | LPE            | MS/MS                      | 2.04                               | 0.0474                         | 1.03                       |
| 1hr        | 542       | PE(18:0/0:0)          | Neg            | 1.92           | 480.3093      | [M-H]-          | LPE            | MS/MS                      | 2.12                               | 0.0472                         | 1.02                       |
| 1hr        | 682       | PC(O-16:0/0:0)        | Pos            | 1.55           | 482.3623      | [M+H]+          | EtherLPC       | MS/MS                      | 2.14                               | 0.0337                         | 2.82                       |
| 12hr       | 1360      | PC(16:1/16:1)         | Pos            | 4.92           | 730.5399      | [M+H]+          | PC             | MS/MS                      | 0.50                               | 0.0118                         | 4.45                       |
| 12hr       | 512       | PE(O-18:0/0:0)        | Neg            | 2.27           | 466.3282      | [M-H]-          | EtherLPE       | MS/MS                      | 2.62                               | 0.0005                         | 1.15                       |
| 12hr       | 1014      | PG(15:0/15:0)         | Neg            | 4.82           | 693.4702      | [M-H]-          | PG             | MS/MS                      | 2.33                               | 0.0090                         | 0.99                       |
| 12hr       | 249       | Sphinganine           | Pos            | 1.35           | 302.3061      | [M+H]+          | SPB            | STD                        | 2.04                               | 0.0001                         | 0.54                       |
| 12hr       | 1046      | Cer(d18:0/22:0)       | Pos            | 13.91          | 624.6259      | [M+H]+          | Cer            | MS/MS                      | 4.72                               | 0.0000                         | 1.77                       |
| 12hr       | 1117      | Cer(d18:0/24:0)       | Pos            | 14.38          | 652.6591      | [M+H]+          | Cer            | MS/MS                      | 7.29                               | 0.0005                         | 1.89                       |
| 12hr       | 1107      | Cer(d18:0/24:1)       | Pos            | 13.89          | 650.6447      | [M+H]+          | Cer            | MS/MS                      | 5.26                               | 0.0001                         | 1.65                       |
| 12hr       | 1564      | GlcCer(d18:0/22:0)    | Pos            | 13.42          | 786.6767      | [M+H]+          | Cer            | MS/MS                      | 2.54                               | 0.0008                         | 0.99                       |
| 12hr       | 1072      | Cer(d18:0/23:0)       | Pos            | 14.15          | 638.6437      | [M+H]+          | Cer            | MS/MS                      | 2.83                               | 0.0000                         | 0.63                       |
| 36hr       | 199       | Arachidonic acid      | Neg            | 2.08           | 303.229       | [M-H]-          | FFA            | STD                        | 31.72                              | 0.0118                         | 0.79                       |
| 36hr       | 142       | Linoleic acid         | Neg            | 2.22           | 279.2329      | [M-H]-          | FFA            | STD                        | 4.90                               | 0.0153                         | 1.45                       |
| 36hr       | 271       | Docosapentaenoic acid | Neg            | 2.15           | 329.2465      | [M-H]-          | FFA            | STD                        | 14.69                              | 0.0149                         | 1.14                       |
| 36hr       | 147       | Oleic acid            | Neg            | 2.87           | 281.2485      | [M-H]-          | FFA            | STD                        | 4.05                               | 0.0039                         | 1.63                       |
| 36hr       | 249       | Sphinganine           | Pos            | 1.35           | 302.3061      | [M+H]+          | SPB            | STD                        | 5.61                               | 0.0000                         | 0.62                       |
| 36hr       | 1660      | SM(d18:0/24:1)        | Pos            | 13.20          | 815.6995      | [M+H]+          | SM             | MS/MS                      | 2.24                               | 0.0000                         | 2.46                       |
| 36hr       | 1576      | SM(d18:0/22:0)        | Pos            | 13.22          | 789.6842      | [M+H]+          | SM             | MS/MS                      | 2.49                               | 0.0000                         | 1.74                       |
| 36hr       | 1669      | SM(d18:0/24:0)        | Pos            | 13.79          | 817.7166      | [M+H]+          | SM             | MS/MS                      | 3.15                               | 0.0000                         | 1.51                       |
| 36hr       | 1175      | SM(d18:1/14:0)        | Pos            | 4.53           | 675.545       | [M+H]+          | SM             | MS/MS                      | 0.28                               | 0.0000                         | 2.50                       |
| 36hr       | 1557      | SM(d18:1/22:1)        | Pos            | 10.26          | 785.6556      | [M+H]+          | SM             | MS/MS                      | 0.45                               | 0.0001                         | 1.47                       |
| 36hr       | 1734      | SM(d18:1/26:1)        | Pos            | 13.55          | 841.7136      | [M+H]+          | SM             | MS/MS                      | 0.39                               | 0.0000                         | 0.80                       |
| 36hr       | 831       | Cer(d18:0/16:0)       | Pos            | 9.06           | 540.5351      | [M+H]+          | Cer            | MS/MS                      | 69.80                              | 0.0000                         | 2.17                       |
| 36hr       | 973       | Cer(d18:0/20:0)       | Pos            | 13.37          | 596.5977      | [M+H]+          | Cer            | MS/MS                      | 15.77                              | 0.0000                         | 0.91                       |

|      |        |                                   |     |       |           |                        |          |       |       |        |      |
|------|--------|-----------------------------------|-----|-------|-----------|------------------------|----------|-------|-------|--------|------|
| 36hr | 1046   | Cer(d18:0/22:0)                   | Pos | 13.91 | 624.6259  | [M+H] <sup>+</sup>     | Cer      | MS/MS | 50.14 | 0.0000 | 2.51 |
| 36hr | 1037-p | Cer(d18:0/22:1)                   | Pos | 13.35 | 622.6116  | [M+H] <sup>+</sup>     | Cer      | MS/MS | 40.99 | 0.0000 | 0.96 |
| 36hr | 1066   | Cer(d18:0/23:1)                   | Pos | 13.98 | 636.6281  | [M+H] <sup>+</sup>     | Cer      | MS/MS | 12.11 | 0.0000 | 0.89 |
| 36hr | 889    | Cer(d18:0/24:0)                   | Neg | 14.42 | 650.6456  | [M-H] <sup>-</sup>     | Cer      | MS/MS | 32.41 | 0.0000 | 0.78 |
| 36hr | 828    | Cer(d18:1/16:0)                   | Pos | 8.22  | 538.5209  | [M+H] <sup>+</sup>     | Cer      | MS/MS | 22.60 | 0.0000 | 1.95 |
| 36hr | 1038-p | Cer(d18:1/22:0)                   | Pos | 13.73 | 622.6124  | [M+H] <sup>+</sup>     | Cer      | MS/MS | 19.84 | 0.0000 | 1.97 |
| 36hr | 1035   | Cer(d18:1/22:1)                   | Pos | 13.14 | 620.5943  | [M+H] <sup>+</sup>     | Cer      | MS/MS | 12.05 | 0.0000 | 1.04 |
| 36hr | 1061   | Cer(d18:1/23:1)                   | Pos | 13.44 | 634.6111  | [M+H] <sup>+</sup>     | Cer      | MS/MS | 16.17 | 0.0000 | 0.90 |
| 36hr | 1108   | Cer(d18:1/24:0)                   | Pos | 14.23 | 650.6452  | [M+H] <sup>+</sup>     | Cer      | MS/MS | 7.11  | 0.0000 | 2.49 |
| 36hr | 1102   | Cer(d18:1/24:1)                   | Pos | 13.71 | 648.6284  | [M+H] <sup>+</sup>     | Cer      | MS/MS | 13.15 | 0.0000 | 3.05 |
| 36hr | 1564   | GlcCer(d18:0/22:0)                | Pos | 13.42 | 786.6767  | [M+H] <sup>+</sup>     | Cer      | MS/MS | 10.74 | 0.0000 | 0.68 |
| 36hr | 1072   | GlcCer(d18:0/23:0)                | Pos | 14.15 | 638.6437  | [M+H] <sup>+</sup>     | Cer      | MS/MS | 26.78 | 0.0000 | 0.84 |
| 36hr | 2034   | CL(1'-[16:0/18:1],3'-[16:0/18:1]) | Neg | 15.33 | 1403.9961 | [M-H] <sup>-</sup>     | CL       | MS/MS | 2.37  | 0.0000 | 1.29 |
| 36hr | 1017   | DG(16:0/18:1/0:0)                 | Pos | 13.02 | 612.5557  | [M+NH4] <sup>+</sup>   | DG       | MS/MS | 0.44  | 0.0000 | 1.16 |
| 36hr | 1287   | PC(14:0/16:0)                     | Neg | 6.62  | 764.5466  | [M+Hac-H] <sup>-</sup> | PC       | MS/MS | 5.30  | 0.0001 | 1.63 |
| 36hr | 1186   | PC(14:0/14:0)                     | Pos | 4.59  | 678.5083  | [M+H] <sup>+</sup>     | PC       | MS/MS | 0.28  | 0.0000 | 4.47 |
| 36hr | 1267   | PC(14:0/16:1)                     | Pos | 4.77  | 704.5242  | [M+H] <sup>+</sup>     | PC       | MS/MS | 0.31  | 0.0000 | 4.17 |
| 36hr | 1323   | PC(15:0/16:0)                     | Pos | 6.53  | 720.5542  | [M+H] <sup>+</sup>     | PC       | MS/MS | 6.26  | 0.0000 | 3.27 |
| 36hr | 1359   | PC(32:2)                          | Pos | 5.74  | 730.5393  | [M+H] <sup>+</sup>     | PC       | MS/MS | 2.69  | 0.0014 | 0.84 |
| 36hr | 1360   | PC(16:1/16:1)                     | Pos | 4.92  | 730.5399  | [M+H] <sup>+</sup>     | PC       | MS/MS | 0.19  | 0.0000 | 5.00 |
| 36hr | 1421   | PC(16:0/17:0)                     | Pos | 8.56  | 748.5853  | [M+H] <sup>+</sup>     | PC       | MS/MS | 2.33  | 0.0000 | 1.48 |
| 36hr | 1412   | PC(15:0/18:1)                     | Pos | 6.74  | 746.5699  | [M+H] <sup>+</sup>     | PC       | MS/MS | 3.02  | 0.0002 | 1.61 |
| 36hr | 1538   | PC(16:0/20:4)                     | Pos | 6.30  | 782.5695  | [M+H] <sup>+</sup>     | PC       | MS/MS | 6.94  | 0.0000 | 2.99 |
| 36hr | 1531   | PC(16:0/20:5)                     | Pos | 5.28  | 780.555   | [M+H] <sup>+</sup>     | PC       | MS/MS | 6.30  | 0.0001 | 1.14 |
| 36hr | 1625   | PC(16:0/22:6)                     | Pos | 5.81  | 806.5711  | [M+H] <sup>+</sup>     | PC       | MS/MS | 8.20  | 0.0001 | 2.72 |
| 36hr | 1719   | PC(18:0/22:5)                     | Pos | 8.37  | 836.6152  | [M+H] <sup>+</sup>     | PC       | MS/MS | 15.17 | 0.0000 | 1.11 |
| 36hr | 1713   | PC(18:0/22:6)                     | Pos | 7.69  | 834.5999  | [M+H] <sup>+</sup>     | PC       | MS/MS | 15.41 | 0.0000 | 1.26 |
| 36hr | 1770   | PC(18:1/24:1)                     | Pos | 13.59 | 870.6934  | [M+H] <sup>+</sup>     | PC       | MS/MS | 3.64  | 0.0001 | 1.13 |
| 36hr | 713    | PC(16:0/0:0)                      | Pos | 1.33  | 496.3409  | [M+H] <sup>+</sup>     | LPC      | MS/MS | 0.48  | 0.0002 | 1.66 |
| 36hr | 1467   | PC(O-14:0/21:1)                   | Pos | 10.97 | 760.6216  | [M+H] <sup>+</sup>     | Ether-PC | MS/MS | 2.43  | 0.0001 | 0.90 |

|      |        |                  |     |       |          |                    |           |       |        |        |      |
|------|--------|------------------|-----|-------|----------|--------------------|-----------|-------|--------|--------|------|
| 36hr | 1517   | PC(O-14:0/22:1)  | Pos | 12.86 | 774.6379 | [M+H] <sup>+</sup> | Ether-PC  | MS/MS | 2.08   | 0.0000 | 1.59 |
| 36hr | 1278   | PC(O-31:0)       | Pos | 7.69  | 706.5745 | [M+H] <sup>+</sup> | Ether-PC  | MS/MS | 2.40   | 0.0000 | 1.11 |
| 36hr | 1503-p | PC(O-36:3)       | Pos | 8.31  | 770.6057 | [M+H] <sup>+</sup> | Ether-PC  | MS/MS | 4.95   | 0.0000 | 1.37 |
| 36hr | 1484   | PC(O-18:0/18:5)  | Pos | 6.15  | 766.5747 | [M+H] <sup>+</sup> | Ether-PC  | MS/MS | 10.73  | 0.0000 | 1.47 |
| 36hr | 1613   | PC(O-14:0/24:2)  | Pos | 12.92 | 800.6533 | [M+H] <sup>+</sup> | Ether-PC  | MS/MS | 2.34   | 0.0002 | 1.19 |
| 36hr | 1598   | PC(O-14:0/24:4)  | Pos | 9.76  | 796.6219 | [M+H] <sup>+</sup> | Ether-PC  | MS/MS | 5.45   | 0.0001 | 0.87 |
| 36hr | 1589   | PC(O-16:0/22:5)  | Pos | 7.50  | 794.6072 | [M+H] <sup>+</sup> | Ether-PC  | MS/MS | 6.70   | 0.0001 | 2.46 |
| 36hr | 1583   | PC(O-16:0/22:6)  | Pos | 6.84  | 792.5917 | [M+H] <sup>+</sup> | Ether-PC  | MS/MS | 9.01   | 0.0000 | 2.41 |
| 36hr | 993    | PE(16:1/16:1)    | Neg | 5.31  | 686.4756 | [M-H] <sup>-</sup> | PE        | MS/MS | 0.34   | 0.0005 | 0.72 |
| 36hr | 1312   | PE(18:0/20:1)    | Neg | 10.78 | 772.5868 | [M-H] <sup>-</sup> | PE        | MS/MS | 2.07   | 0.0000 | 0.70 |
| 36hr | 454    | PE(O-16:0/0:0)   | Neg | 1.61  | 438.2962 | [M-H] <sup>-</sup> | Ether-LPE | MS/MS | 3.37   | 0.0003 | 0.89 |
| 36hr | 512    | PE(O-18:0/0:0)   | Neg | 2.27  | 466.3282 | [M-H] <sup>-</sup> | Ether-LPE | MS/MS | 4.85   | 0.0002 | 0.67 |
| 36hr | 1435   | PE(O-38:5)       | Pos | 8.08  | 752.5586 | [M+H] <sup>+</sup> | Ether-PE  | MS/MS | 19.78  | 0.0000 | 1.08 |
| 36hr | 1050   | PE(O-16:0/18:1)  | Neg | 10.54 | 702.5435 | [M-H] <sup>-</sup> | Ether-PE  | MS/MS | 7.90   | 0.0001 | 1.34 |
| 36hr | 1143   | PE(O-36:1)       | Neg | 12.99 | 730.5742 | [M-H] <sup>-</sup> | Ether-PE  | MS/MS | 3.11   | 0.0004 | 1.43 |
| 36hr | 1118   | PE(O-36:4)       | Neg | 8.10  | 724.5287 | [M-H] <sup>-</sup> | Ether-PE  | MS/MS | 18.92  | 0.0000 | 2.71 |
| 36hr | 1240   | PE(O-18:0/20:4)  | Neg | 10.77 | 752.5615 | [M-H] <sup>-</sup> | Ether-PE  | MS/MS | 4.87   | 0.0001 | 2.39 |
| 36hr | 1347   | PE(O-18:0/22:5)  | Neg | 10.79 | 778.587  | [M-H] <sup>-</sup> | Ether-PE  | MS/MS | 5.72   | 0.0001 | 1.73 |
| 36hr | 1231   | PE(P-18:0/20:4)  | Neg | 10.23 | 750.5458 | [M-H] <sup>-</sup> | Ether-PE  | MS/MS | 2.13   | 0.0048 | 1.16 |
| 36hr | 1325   | PE(P-18:0/22:6)  | Neg | 9.46  | 774.55   | [M-H] <sup>-</sup> | Ether-PE  | MS/MS | 2.24   | 0.0030 | 1.00 |
| 36hr | 614    | PG(18:0/0:0)     | Neg | 1.49  | 511.3034 | [M-H] <sup>-</sup> | LPG       | MS/MS | 32.73  | 0.0001 | 0.76 |
| 36hr | 1099   | PG(14:0/18:1)    | Neg | 4.18  | 719.4863 | [M-H] <sup>-</sup> | PG        | MS/MS | 0.47   | 0.0061 | 0.77 |
| 36hr | 1503   | PG(18:2/22:6)    | Neg | 3.59  | 817.5042 | [M-H] <sup>-</sup> | PG        | MS/MS | 2.20   | 0.0055 | 0.63 |
| 36hr | 1556   | PI(16:1/18:1)    | Neg | 4.77  | 833.5212 | [M-H] <sup>-</sup> | PI        | MS/MS | 0.15   | 0.0000 | 1.99 |
| 36hr | 1645   | PI(18:1/18:1)    | Neg | 6.10  | 861.5536 | [M-H] <sup>-</sup> | PI        | MS/MS | 0.42   | 0.0002 | 3.76 |
| 36hr | 1708   | PI(18:1/20:3)    | Neg | 6.14  | 885.5534 | [M-H] <sup>-</sup> | PI        | MS/MS | 2.88   | 0.0008 | 2.12 |
| 36hr | 1703   | PI(18:1/20:4)    | Neg | 4.89  | 883.5369 | [M-H] <sup>-</sup> | PI        | MS/MS | 2.19   | 0.0054 | 1.28 |
| 36hr | 1153   | PS(16:0/16:1)    | Neg | 4.85  | 732.4832 | [M-H] <sup>-</sup> | PS        | MS/MS | 0.43   | 0.0005 | 1.19 |
| 48hr | 199    | Arachidonic acid | Neg | 2.08  | 303.229  | [M-H] <sup>-</sup> | FFA       | STD   | 139.10 | 0.0000 | 1.18 |
| 48hr | 142    | Linoleic acid    | Neg | 2.22  | 279.2329 | [M-H] <sup>-</sup> | FFA       | STD   | 10.83  | 0.0004 | 1.53 |
| 48hr | 147    | Oleic acid       | Neg | 2.87  | 281.2485 | [M-H] <sup>-</sup> | FFA       | STD   | 6.40   | 0.0002 | 1.63 |



|      |        |                                   |     |       |           |                      |           |       |        |        |      |
|------|--------|-----------------------------------|-----|-------|-----------|----------------------|-----------|-------|--------|--------|------|
| 48hr | 249    | Sphinganine                       | Pos | 1.35  | 302.3061  | [M+H] <sup>+</sup>   | SPB       | STD   | 18.62  | 0.0000 | 0.71 |
| 48hr | 1275   | SM(d18:0/16:0)                    | Pos | 6.50  | 705.5903  | [M+H] <sup>+</sup>   | SM        | MS/MS | 5.14   | 0.0000 | 4.28 |
| 48hr | 1660   | SM(d18:0/24:1)                    | Pos | 13.20 | 815.6995  | [M+H] <sup>+</sup>   | SM        | MS/MS | 5.42   | 0.0000 | 2.65 |
| 48hr | 1576   | SM d18:0/22:0                     | Pos | 13.22 | 789.6842  | [M+H] <sup>+</sup>   | SM        | MS/MS | 5.79   | 0.0000 | 1.77 |
| 48hr | 1669   | SM d18:0/24:0                     | Pos | 13.79 | 817.7166  | [M+H] <sup>+</sup>   | SM        | MS/MS | 6.15   | 0.0000 | 1.37 |
| 48hr | 1265   | SM(d18:1/16:0)                    | Pos | 5.87  | 703.576   | [M+H] <sup>+</sup>   | SM        | MS/MS | 2.01   | 0.0000 | 6.93 |
| 48hr | 973    | Cer(d18:0/20:0)                   | Pos | 13.37 | 596.5977  | [M+H] <sup>+</sup>   | Cer       | MS/MS | 43.46  | 0.0000 | 1.01 |
| 48hr | 1037-p | Cer(d18:0/22:1)                   | Pos | 13.35 | 622.6116  | [M+H] <sup>+</sup>   | Cer       | MS/MS | 163.23 | 0.0000 | 1.17 |
| 48hr | 1066   | Cer(d18:0/23:1)                   | Pos | 13.98 | 636.6281  | [M+H] <sup>+</sup>   | Cer       | MS/MS | 34.75  | 0.0000 | 0.99 |
| 48hr | 828    | Cer(d18:1/16:0)                   | Pos | 8.22  | 538.5209  | [M+H] <sup>+</sup>   | Cer       | MS/MS | 62.79  | 0.0000 | 2.01 |
| 48hr | 968    | Cer(d18:1/20:0)                   | Pos | 13.14 | 594.5796  | [M+H] <sup>+</sup>   | Cer       | MS/MS | 39.95  | 0.0000 | 1.09 |
| 48hr | 1038-p | Cer(d18:1/22:0)                   | Pos | 13.73 | 622.6124  | [M+H] <sup>+</sup>   | Cer       | MS/MS | 56.02  | 0.0000 | 2.12 |
| 48hr | 1061   | Cer(d18:1/23:1)                   | Pos | 13.44 | 634.6111  | [M+H] <sup>+</sup>   | Cer       | MS/MS | 52.94  | 0.0000 | 1.01 |
| 48hr | 1108   | Cer(d18:1/24:0)                   | Pos | 14.23 | 650.6452  | [M+H] <sup>+</sup>   | Cer       | MS/MS | 20.14  | 0.0000 | 2.71 |
| 48hr | 1102   | Cer(d18:1/24:1)                   | Pos | 13.71 | 648.6284  | [M+H] <sup>+</sup>   | Cer       | MS/MS | 47.00  | 0.0000 | 3.36 |
| 48hr | 1072   | GlcCer(d18:0/23:0)                | Pos | 14.15 | 638.6437  | [M+H] <sup>+</sup>   | Cer       | MS/MS | 59.04  | 0.0000 | 0.90 |
| 48hr | 1658   | GlcCer(d18:0/24:0)                | Pos | 13.92 | 814.7109  | [M+H] <sup>+</sup>   | Cer       | MS/MS | 33.69  | 0.0000 | 0.84 |
| 48hr | 2034   | CL(1'-[16:0/18:1],3'-[16:0/18:1]) | Neg | 15.33 | 1403.9961 | [M-H] <sup>-</sup>   | CL        | MS/MS | 5.39   | 0.0000 | 1.34 |
| 48hr | 2030   | CL(1'-[16:0/18:1],3'-[16:1/18:1]) | Neg | 15.10 | 1401.9806 | [M-H] <sup>-</sup>   | CL        | MS/MS | 2.79   | 0.0003 | 1.12 |
| 48hr | 2057   | CL(1'-[16:1/18:0],3'-[18:1/18:1]) | Neg | 15.33 | 1430.0106 | [M-H] <sup>-</sup>   | CL        | MS/MS | 3.92   | 0.0000 | 1.09 |
| 48hr | 454    | PE(O-16:0/0:0)                    | Neg | 1.61  | 438.2962  | [M-H] <sup>-</sup>   | Ether-LPE | MS/MS | 7.84   | 0.0000 | 0.95 |
| 48hr | 512    | PE(O-18:0/0:0)                    | Neg | 2.27  | 466.3282  | [M-H] <sup>-</sup>   | Ether-LPE | MS/MS | 10.79  | 0.0000 | 0.67 |
| 48hr | 1186   | PC(14:0/14:0)                     | Pos | 4.59  | 678.5083  | [M+H] <sup>+</sup>   | PC        | MS/MS | 0.42   | 0.0085 | 2.55 |
| 48hr | 1287   | PC(14:0/16:0)                     | Neg | 6.62  | 764.5466  | [M-H] <sup>-</sup>   | PC        | MS/MS | 8.21   | 0.0001 | 1.36 |
| 48hr | 1323   | PC(15:0/16:0)                     | Pos | 6.53  | 720.5542  | [M+H] <sup>+</sup>   | PC        | MS/MS | 12.09  | 0.0000 | 2.93 |
| 48hr | 1412   | PC(15:0/18:1)                     | Pos | 6.74  | 746.5699  | [M+NH4] <sup>+</sup> | PC        | MS/MS | 5.90   | 0.0001 | 1.55 |
| 48hr | 1491   | PC(15:0/20:4)                     | Pos | 7.06  | 768.5585  | [M+Na] <sup>+</sup>  | PC        | MS/MS | 5.65   | 0.0000 | 1.04 |
| 48hr | 1421   | PC(16:0/17:0)                     | Pos | 8.56  | 748.5853  | [M+H] <sup>+</sup>   | PC        | MS/MS | 4.91   | 0.0000 | 1.57 |
| 48hr | 1538   | PC(16:0/20:4)                     | Pos | 6.30  | 782.5695  | [M+H] <sup>+</sup>   | PC        | MS/MS | 22.07  | 0.0000 | 3.16 |
| 48hr | 1531   | PC(16:0/20:5)                     | Pos | 5.28  | 780.555   | [M+H] <sup>+</sup>   | PC        | MS/MS | 17.68  | 0.0000 | 1.22 |
| 48hr | 1625   | PC(16:0/22:6)                     | Pos | 5.81  | 806.5711  | [M+H] <sup>+</sup>   | PC        | MS/MS | 29.52  | 0.0000 | 3.01 |

|      |        |                 |     |       |          |                    |           |       |       |        |      |
|------|--------|-----------------|-----|-------|----------|--------------------|-----------|-------|-------|--------|------|
| 48hr | 1360   | PC(16:1/16:1)   | Pos | 4.92  | 730.5399 | [M+H] <sup>+</sup> | PC        | MS/MS | 0.34  | 0.0055 | 2.54 |
| 48hr | 1719   | PC(18:0/22:5)   | Pos | 8.37  | 836.6152 | [M+H] <sup>+</sup> | PC        | MS/MS | 55.22 | 0.0000 | 1.25 |
| 48hr | 1713   | PC(18:0/22:6)   | Pos | 7.69  | 834.5999 | [M+H] <sup>+</sup> | PC        | MS/MS | 63.30 | 0.0000 | 1.55 |
| 48hr | 1630   | PC(18:1/20:4)   | Pos | 6.39  | 808.5858 | [M+H] <sup>+</sup> | PC        | MS/MS | 26.57 | 0.0000 | 2.53 |
| 48hr | 1770   | PC(18:1/24:1)   | Pos | 13.59 | 870.6934 | [M+H] <sup>+</sup> | PC        | MS/MS | 5.97  | 0.0000 | 1.11 |
| 48hr | 1359   | PC(32:2)        | Pos | 5.74  | 730.5393 | [M+H] <sup>+</sup> | PC        | MS/MS | 8.29  | 0.0000 | 1.02 |
| 48hr | 1312   | PE(18:0/20:1)   | Neg | 10.78 | 772.5868 | [M-H] <sup>-</sup> | PE        | MS/MS | 3.11  | 0.0001 | 0.68 |
| 48hr | 1190   | PE(18:1/18:1)   | Neg | 9.06  | 742.5417 | [M-H] <sup>-</sup> | PE        | MS/MS | 2.02  | 0.0041 | 1.33 |
| 48hr | 682    | PC(O-16:0/0:0)  | Pos | 1.55  | 482.3623 | [M+H] <sup>+</sup> | Ether-LPC | MS/MS | 2.55  | 0.0002 | 1.02 |
| 48hr | 1368   | PC(O-14:0/19:1) | Pos | 8.33  | 732.5909 | [M+H] <sup>+</sup> | Ether-PC  | MS/MS | 4.61  | 0.0000 | 1.99 |
| 48hr | 1467   | PC(O-14:0/21:1) | Pos | 10.97 | 760.6216 | [M+H] <sup>+</sup> | Ether-PC  | MS/MS | 5.37  | 0.0000 | 1.05 |
| 48hr | 1517   | PC(O-14:0/22:1) | Pos | 12.86 | 774.6379 | [M+H] <sup>+</sup> | Ether-PC  | MS/MS | 4.48  | 0.0000 | 1.78 |
| 48hr | 1613   | PC(O-14:0/24:2) | Pos | 12.92 | 800.6533 | [M+H] <sup>+</sup> | Ether-PC  | MS/MS | 5.41  | 0.0000 | 1.42 |
| 48hr | 1598   | PC(O-14:0/24:4) | Pos | 9.76  | 796.6219 | [M+H] <sup>+</sup> | Ether-PC  | MS/MS | 15.84 | 0.0000 | 1.03 |
| 48hr | 1583   | PC(O-16:0/22:6) | Pos | 6.84  | 792.5917 | [M+H] <sup>+</sup> | Ether-PC  | MS/MS | 23.93 | 0.0000 | 2.56 |
| 48hr | 1484   | PC(O-18:0/18:5) | Pos | 6.15  | 766.5747 | [M+H] <sup>+</sup> | Ether-PC  | MS/MS | 30.02 | 0.0000 | 1.58 |
| 48hr | 1278   | PC(O-31:0)      | Pos | 7.69  | 706.5745 | [M+H] <sup>+</sup> | Ether-PC  | MS/MS | 5.92  | 0.0000 | 1.35 |
| 48hr | 1503-p | PC(O-36:3)      | Pos | 8.31  | 770.6057 | [M+H] <sup>+</sup> | Ether-PC  | MS/MS | 12.38 | 0.0000 | 1.43 |
| 48hr | 1252   | PE(O-16:0/18:3) | Pos | 8.03  | 700.5284 | [M+H] <sup>+</sup> | Ether-PE  | MS/MS | 4.65  | 0.0000 | 1.14 |
| 48hr | 1037   | PE(P-18:0/16:1) | Neg | 10.79 | 700.5297 | [M-H] <sup>-</sup> | Ether-PE  | MS/MS | 2.02  | 0.0002 | 0.98 |
| 48hr | 1038   | PE(P-16:0/18:1) | Neg | 10.09 | 700.5308 | [M-H] <sup>-</sup> | Ether-PE  | MS/MS | 2.34  | 0.0009 | 2.69 |
| 48hr | 1050   | PE(O-16:0/18:1) | Neg | 10.54 | 702.5435 | [M-H] <sup>-</sup> | Ether-PE  | MS/MS | 15.20 | 0.0000 | 1.29 |
| 48hr | 1103   | PE(O-16:1/20:5) | Neg | 6.43  | 720.4991 | [M-H] <sup>-</sup> | Ether-PE  | MS/MS | 3.29  | 0.0002 | 1.35 |
| 48hr | 1240   | PE(O-18:0/20:4) | Neg | 10.77 | 752.5615 | [M-H] <sup>-</sup> | Ether-PE  | MS/MS | 8.92  | 0.0000 | 2.08 |
| 48hr | 1347   | PE(O-18:0/22:5) | Neg | 10.79 | 778.587  | [M-H] <sup>-</sup> | Ether-PE  | MS/MS | 9.06  | 0.0000 | 1.51 |
| 48hr | 1344   | PE(O-18:1/18:3) | Pos | 8.08  | 726.5424 | [M+H] <sup>+</sup> | Ether-PE  | MS/MS | 24.06 | 0.0000 | 1.14 |
| 48hr | 1143   | PE(O-36:1)      | Neg | 12.99 | 730.5742 | [M-H] <sup>-</sup> | Ether-PE  | MS/MS | 6.49  | 0.0000 | 1.48 |
| 48hr | 1118   | PE(O-36:4)      | Neg | 8.10  | 724.5287 | [M-H] <sup>-</sup> | Ether-PE  | MS/MS | 33.21 | 0.0000 | 2.19 |
| 48hr | 1435   | PE(O-38:5)      | Pos | 8.08  | 752.5586 | [M+H] <sup>+</sup> | Ether-PE  | MS/MS | 51.70 | 0.0000 | 1.08 |
| 48hr | 1112   | PE(P-16:0/20:4) | Neg | 7.73  | 722.5151 | [M-H] <sup>-</sup> | Ether-PE  | MS/MS | 3.25  | 0.0000 | 3.03 |
| 48hr | 1331   | PE(P-16:0/20:5) | Pos | 6.34  | 722.5127 | [M+H] <sup>+</sup> | Ether-PE  | MS/MS | 4.58  | 0.0000 | 1.46 |

|      |      |                 |     |       |          |          |          |       |      |        |      |
|------|------|-----------------|-----|-------|----------|----------|----------|-------|------|--------|------|
| 48hr | 1219 | PE(P-16:0/22:5) | Neg | 7.84  | 748.5311 | [M-H]-   | Ether-PE | MS/MS | 3.28 | 0.0000 | 2.42 |
| 48hr | 1253 | PE(P-18:0/20:1) | Neg | 13.52 | 756.5933 | [M-H]-   | Ether-PE | MS/MS | 2.15 | 0.0017 | 1.19 |
| 48hr | 1325 | PE(P-18:0/22:6) | Neg | 9.46  | 774.55   | [M-H]-   | Ether-PE | MS/MS | 4.69 | 0.0000 | 1.15 |
| 48hr | 1212 | PG(16:0/18:1)   | Neg | 6.37  | 747.5214 | [M-H]-   | PG       | MS/MS | 2.10 | 0.0007 | 1.12 |
| 48hr | 1503 | PG(18:2/22:6)   | Neg | 3.59  | 817.5042 | [M-H]-   | PG       | MS/MS | 2.95 | 0.0010 | 0.57 |
| 48hr | 1578 | PG(19:1-17:2)   | Pos | 8.25  | 790.5621 | [M+NH4]+ | PG       | MS/MS | 3.52 | 0.0000 | 1.79 |
| 48hr | 1556 | PI(16:1/18:1)   | Neg | 4.77  | 833.5212 | [M-H]-   | PI       | MS/MS | 0.17 | 0.0056 | 1.17 |
| 48hr | 1645 | PI(18:1/18:1)   | Neg | 6.10  | 861.5536 | [M-H]-   | PI       | MS/MS | 0.47 | 0.0059 | 2.14 |
| 48hr | 1708 | PI(18:1/20:3)   | Neg | 6.14  | 885.5534 | [M-H]-   | PI       | MS/MS | 6.34 | 0.0000 | 2.35 |
| 48hr | 1382 | PS(18:0/18:1)   | Neg | 8.10  | 788.5485 | [M-H]-   | PS       | MS/MS | 2.94 | 0.0000 | 4.80 |

MSMS = lipids that were confirmed with fragment pattern of database; STD = lipids that were confirmed with authentic standards; The 'O-' prefix is used to indicate the presence of an alkyl ether substituent, e.g., PC (O-16:0/0:0), whereas the 'P-' prefix is used for the 1Z-alkenyl ether (Plasmalogen) substituent, e.g., PE (P-16:0/16:0). Abbreviations: Cer, ceramide; CL, cardiolipin; DG, diacylglycerol; EtherLPC, ether-linked lysophosphatidylcholine; EtherPC, ether-linked phosphatidylcholine; EtherLPE, ether-linked lysophosphatidylethanolamine; EtherPE, ether-linked phosphatidylethanolamine; FFA, free fatty acid; LPC, lysophosphatidylcholine; LPE, lysophosphatidylethanolamine; LPG, LysophosphatidylglycerolPC, phosphatidylcholine; PE, phosphatidylethanolamine; PG, phosphatidylglycerol; PI, phosphatidylinositol; PS, phosphatidylserine; SM, sphingomyelin; SPB, sphingoid base. The highlight pink label represents reproducible lipids in different infection time.

**Table S3. Targeted metabolites' concentration in linoleic acid metabolism pathway upon exogenous linoleic acid addition**

| Lipids                  | Averaged concentration ( $\mu\text{M}$ ), sample number =3 |         |        |            | Fold change  |                  |
|-------------------------|------------------------------------------------------------|---------|--------|------------|--------------|------------------|
|                         | Mock                                                       | Mock+LA | Infect | Infect +LA | Mock+LA/Mock | Infect+LA/Infect |
| Linoleic acid           | 0.39                                                       | 5.65    | 0.31   | 6.06       | 14.32        | 19.42            |
| $\gamma$ -Linoleic acid | 0.03                                                       | 0.39    | 0.03   | 0.35       | 12.88        | 10.24            |
| Arachidonic acid        | 0.09                                                       | 2.45    | 0.1    | 2.27       | 25.82        | 23.67            |
| ( $\pm$ )9-HODE         | 0.05                                                       | 0.17    | 0.06   | 0.23       | 3.54         | 4.06             |
| ( $\pm$ )13-HODE        | 0.12                                                       | 0.68    | 0.16   | 0.99       | 5.66         | 4.49             |
| 12(13)-EpOME            | 0.06                                                       | 0.69    | 0.02   | 0.98       | 16.22        | 19.98            |
| 9(10)-EpOME             | 3.26                                                       | 5.83    | 2.51   | 5.15       | 1.79         | 2.05             |

Mock represents non-infected cells and infect represents *S. aureus* infected cells.

**Table S4. Gradient elution program applied for untargeted lipidomics analysis**

| Time(min) | Flow rate | Mobile phase | Mobile phase | Curve |
|-----------|-----------|--------------|--------------|-------|
|           | (mL/min)  | A (%)        | B (%)        |       |
| Initial   | 0.4       | 60%          | 40%          | 6     |
| 2         | 0.4       | 57%          | 43%          | 6     |
| 2.1       | 0.4       | 50%          | 50%          | 6     |
| 12        | 0.4       | 46%          | 54%          | 6     |
| 12.1      | 0.4       | 30%          | 70%          | 6     |
| 18        | 0.4       | 1%           | 99%          | 6     |
| 18.1      | 0.4       | 60%          | 40%          | 6     |
| 20        | 0.4       | 60%          | 40%          | 6     |

The mobile phase A was 60:40 acetonitrile:water (v/v) with 10 mM ammonium formate and 0.1% formic acid. The mobile phase B for positive mode was 90:10 isopropanol:acetonitrile (v/v) with 10 mM ammonium formate and 0.1% formic acid. The mobile phase B for negative mode was 90:10 isopropanol:acetonitrile (v/v) with 10 mM ammonium acetate

**Table S5. Gradient elution program applied for target lipidomics analysis**

| Time (min) | Flow rate<br>(mL/min) | Mobile phase |       |
|------------|-----------------------|--------------|-------|
|            |                       | A (%)        | B (%) |
| Initial    | 0.4                   | 53%          | 47%   |
| 9          | 0.4                   | 53%          | 47%   |
| 9.1        | 0.4                   | 45%          | 55%   |
| 12         | 0.4                   | 45%          | 55%   |
| 12.1       | 0.4                   | 0%           | 100%  |
| 15         | 0.4                   | 0%           | 100%  |
| 15.1       | 0.4                   | 53%          | 47%   |
| 17         | 0.4                   | 53%          | 47%   |

The mobile phase A was 0.1% acetic acid in water. The mobile phase B was ACN/IPA (90/10 v/v).

**Table S6. List of MRM transitions (M1=precursor; M2= fragment) and retention times for targeted lipids**

| <b>Lipid name</b>   | <b>Retention time (min)</b> | <b>M1</b> | <b>M2</b> |
|---------------------|-----------------------------|-----------|-----------|
| (±)9-HODE           | 16.19                       | 295.2273  | 171.1024  |
| (±)13-HODE          | 15.64                       | 295.2273  | 195.1376  |
| 12(13)-EpOME        | 16.12                       | 295.2273  | 195.1376  |
| 9(10)-EpOME         | 13.26                       | 295.2273  | 183.1     |
| Linoleic acid       | 13.65                       | 279.2324  | 261.2204  |
| γ-Linoleic acid     | 9.97                        | 277.2168  | 259.2053  |
| Arachidonic acid    | 9.45                        | 303.2324  | 259.2411  |
| Arachidonic acid-d8 | 16.1                        | 311.222   | 267.24    |
